# Supplementary material for: Graphether: a two-dimensional oxocarbon as a direct wide-band-gap semiconductor with high mechanical and electrical performances
Source: Royal Society of Chemistry journal article supplement (doi:10.1039/c9nr08071f), 2019-01-01
Supplement: c9nr08071f1.pdf [file c9nr08071f1.pdf]

## Supplementary Information

### **Graphether: A Two-Dimensional Oxocarbon as a Direct Wide-Gap Semiconductor with High Mechanical and Electrical Performances**

Gui-Lin Zhu<sup>1†</sup>, Xiao-Juan Ye<sup>1,2†</sup>, and Chun-Sheng Liu<sup>1,2\*</sup>

<sup>1</sup>Key Laboratory of Radio Frequency and Micro-Nano Electronics of Jiangsu Province, College of Electronic and Optical Engineering, Nanjing University of Posts and Telecommunications, Nanjing 210023, China

<sup>2</sup>School of Engineering, University of British Columbia, Kelowna, BC V1V 1V7, Canada

---

\* To whom correspondences should be addressed, E-mail: cslu@njupt.edu.cn

† The first two authors contributed equally to this work.

**Table S1.** Several schemes for band gap opening in graphene.

| Scheme                                               |                                              | Maximum Band Gap (eV)              |                                |
|------------------------------------------------------|----------------------------------------------|------------------------------------|--------------------------------|
| spatial confinement                                  | width ~15 nm graphene nanoribbon             | 0.2 (Ref. 1)                       |                                |
|                                                      | width N=7 graphene nanoribbon                | 1.6 (Ref. 2)                       |                                |
| sublattice-symmetry breaking                         | strain engineering                           | uniaxial strain                    | 0.486 (Ref. 3)                 |
|                                                      |                                              | anisotropic biaxial strain         | 1.0 (Ref. 4)                   |
|                                                      |                                              | shear strain                       | 0.4 (Ref. 4),<br>0.95 (Ref. 5) |
|                                                      | doping                                       | B                                  | 0.14 (Refs. 6,7)               |
|                                                      |                                              | N                                  | 0.14 (Refs. 6,7)               |
|                                                      |                                              | O                                  | 0.50 (Ref. 7)                  |
|                                                      |                                              | P                                  | 0.67 (Ref. 8)                  |
|                                                      |                                              | S                                  | 0.57 (Ref. 8)                  |
|                                                      |                                              | Ga                                 | 0.6 (Ref. 9)                   |
|                                                      |                                              | Ge                                 | 0.4 (Ref. 9)                   |
|                                                      |                                              | As                                 | 1.3 (Ref. 9)                   |
| Se                                                   | 0.8 (Ref. 9)                                 |                                    |                                |
| graphene antidot lattice                             | 1.55 (Ref. 10)                               |                                    |                                |
| surface functionalization                            | fully hydrogenated                           | 3.7 (Ref. 11)                      |                                |
|                                                      | fully fluorinated                            | 3.48 (Ref. 12)                     |                                |
|                                                      | half hydrogenated                            | 0.43 (Ref. 12)                     |                                |
|                                                      | half hydrogenated and half fluorinated       | 3.70 (Ref. 12)                     |                                |
|                                                      | fully oxidized                               | 4.0 (Ref. 13)                      |                                |
| heterostructure                                      | graphene/h-BN                                | 0.053 (Ref. 14),<br>0.16 (Ref. 15) |                                |
|                                                      | graphene/SiC                                 | 0.26 (Ref. 16)                     |                                |
|                                                      | graphene/fully hydroxylated SiO <sub>2</sub> | 0.023 (Ref. 17)                    |                                |
|                                                      | graphene/O-terminated SiO <sub>2</sub>       | 0.044 (Ref. 17)                    |                                |
| electrically tunable band gap in multilayer graphene | bilayer                                      | 0.1 (Ref. 18),<br>0.25 (Ref. 19)   |                                |
|                                                      | trilayer                                     | 0.12 (Ref. 20)                     |                                |

## Computational details of the carrier mobility and in-plane stiffness

We estimate the carrier mobility for graphether at room temperature (300 K) by

$$\mu_x \approx \frac{eh^3 \left( \frac{5C_x + 3C_y}{8} \right)}{k_B T m_x^{\frac{3}{2}} m_y^{\frac{1}{2}} \left( \frac{9E_{1x}^2 + 7E_{1x}E_{1y} + 4E_{1y}^2}{20} \right)},$$

where  $m_x$  is the

effective mass in the transport direction and  $m_y$  is the effective mass in another

direction. The term  $E_1$  defined by  $E_1 = \frac{\Delta V}{(\Delta l/l_0)}$  represents the DP constant of the

valence-band minimum (VBM) for hole or the conduction-band maximum (CBM) for

electron along the transport direction. Here,  $\Delta V$  denotes the energy change of VBM or

CBM when graphether is compressed or dilated from the equilibrium  $l_0$  by a distance

of  $\Delta l$ . The term  $C_x$  ( $C_y$ ) is the in-plane stiffness of the longitudinal strain in the  $x$  ( $y$ )

direction, which can be derived from  $\frac{\Delta E}{S_0} = C_x \frac{(\Delta l/l_0)^2}{2}$ .  $\Delta E$  denotes the total energy

difference under each strain, and  $S_0$  is the lattice area of pristine graphether. We use

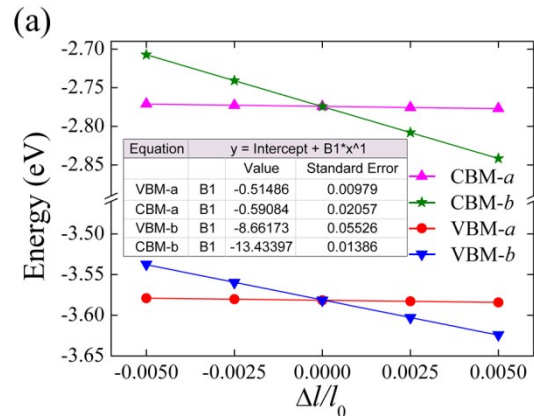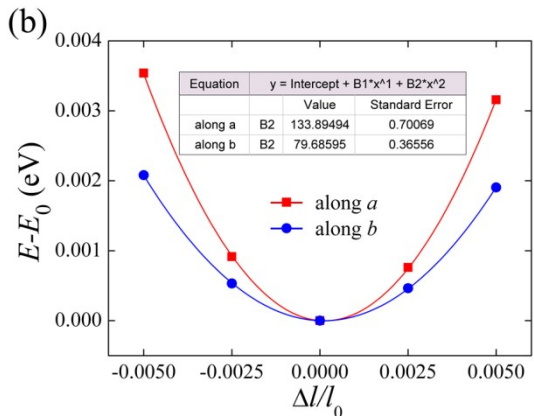

**Fig. S1** (a) DP constants and (b) in-plane stiffness of graphether along  $x$  and  $y$  directions at the HSE06 level of theory.

**Table S2.** Lattice parameter, interlayer distance ( $d_z$ ), binding energy ( $E_b$ ), and band gap for bilayer graphether.

| stacking pattern | lattice parameters (Å) |       | $d_z$ (Å) | $E_b$ (meV Å <sup>-2</sup> ) | band gap (eV) |
|------------------|------------------------|-------|-----------|------------------------------|---------------|
|                  | $a$                    | $b$   |           |                              |               |
| monolayer        | 7.229                  | 5.155 | -         | -                            | 2.39          |
| AA               | 7.233                  | 5.152 | 2.003     | -33.44                       | 2.27          |
| AB               | 7.227                  | 5.154 | 3.451     | -9.42                        | 2.31          |
| AC               | 7.233                  | 5.150 | 2.150     | -27.75                       | 2.27          |
| AD               | 7.227                  | 5.154 | 3.516     | -9.12                        | 2.32          |

**Table S3.** Structural informations of monolayer graphether and  $Pmn2_1$ -BNO.

| Structure     | Space Group | Lattice Parameters             | Wyckoff Positions (fractional) |        |        |        |
|---------------|-------------|--------------------------------|--------------------------------|--------|--------|--------|
|               |             |                                | atoms                          | $x$    | $y$    | $z$    |
| Graphether    | $Pmmn$      | a=3.6144 Å                     | C(4f)                          | 0.2881 | 0      | 0.5180 |
|               |             | b=2.5775 Å                     | O(2a)                          | 0      | 0      | 0.5570 |
|               |             | c=25.0000 Å                    |                                |        |        |        |
|               |             | $\alpha=\beta=\gamma=90^\circ$ |                                |        |        |        |
| $Pmn2_1$ -BNO | $Pmn2_1$    | a=2.6493 Å                     | B(2a)                          | 0      | 0.4811 | 0.7062 |
|               |             | b=25.0000 Å                    | N(2a)                          | 0      | 0.4825 | 0.2816 |
|               |             | c=3.6579 Å                     | O(2a)                          | 0      | 0.4414 | 0.9897 |
|               |             | $\alpha=\beta=\gamma=90^\circ$ |                                |        |        |        |

## References

- 1 M. Y. Han, B. Özyilmaz, Y. Zhang, P. Kim, *Phys. Rev. Lett.* 2007, **98**, 206805.
- 2 J. Cai, P. Ruffieux, R. Jaafar, M. Bieri, T. Braun, S. Blankenburg, M. Muoth, A. P. Seitsonen, M. Saleh, X. Feng, K. Müllen, R. Fasel, *Nature* 2010, **466**, 470–473.
- 3 G. Gui, J. Li, J. Zhong, *Phys. Rev. B: Condens. Matter Mater. Phys.* 2008, **78**, 075435.
- 4 N. Kerszberg, P. Suryanarayana, *RSC Adv.* 2015, **5**, 43810–43814.
- 5 G. Cocco, E. Cadelano, L. Colombo, *Phys. Rev. B: Condens. Matter Mater.* 2010, **81**, 241412.
- 6 P. Rani, V. K. Jindal, *RSC Adv.* 2013, **3**, 802–812.
- 7 M. Wu, C. Cao, J. Z. Jiang, *Nanotechnology* 2010, **21**, 505202.
- 8 P. A. Denis, *Chem. Phys. Lett.* 2010, **492**, 251–257.
- 9 P. A. Denis, *Chem. Phys. Chem.* 2014, **15**, 3994–4000.
- 10 F. Ouyang, S. Peng, Z. Liu, Z. Liu, *ACS Nano* 2011, **5**, 4023–4030.
- 11 J. O. Sofo, A. S. Chaudhari, G. D. Barber, *Phys. Rev. B: Condens. Matter Mater.* 2007, **75**, 153401.
- 12 J. Zhou, M. M. Wu, X. Zhou, Q. Sun, *Appl. Phys. Lett.* 2009, **95**, 103108.
- 13 J. -A. Yan, M. Y. Chou, *Phys. Rev. B: Condens. Matter Mater.* 2010, **82**, 125403.
- 14 G. Giovannetti, P. A. Khomyakov, G. Brocks, P. J. Kelly, J. van den Brink, *Phys. Rev. B: Condens. Matter Mater. Phys.* 2007, **76**, 073103.
- 15 E. Wang, X. Lu, S. Ding, W. Yao, M. Yan, G. Wan, K. Deng, S. Wang, G. Chen, L. Ma, J. Jung, A. V. Fedorov, Y. Zhang, G. Zhang, S. Zhou, *Nat. Phys.* 2016, **12**, 1111–1115.
- 16 S. Y. Zhou, G. H. Gweon, A. V. Fedorov, P. N. First, W. A. De Heer, D. H. Lee, F. Guinea, A. H. Castro Neto, A. Lanzara, *Nat. Mater.* 2007, **6**, 770–775.
- 17 T. C. Nguyen, M. Otani, S. Okada, *Phys. Rev. Lett.* 2011, **106**, 106801.
- 18 Y. Hao, L. Wang, Y. Liu, H. Chen, X. Wang, C. Tan, S. Nie, J. W. Suk, T.

- Jiang, T. Liang, J. Xiao, W. Ye, C. R. Dean, B. I. Yakobson, K. F. McCarty, P. Kim, J. Hone, L. Colombo, R. S. Ruoff, *Nat. Nanotechnol.* 2016, **11**, 426–431.
- 19 Y. Zhang, T. T. Tang, C. Girit, Z. Hao, M. C. Martin, A. Zettl, M. F. Crommie, Y. R. Shen, F. Wang, *Nature* 2009, **459**, 820–823.
- 20 C. H. Lui, Z. Li, K. F. Mak, E. Cappelluti, T. F. Heinz, *Nat. Phys.* 2011, **7**, 944–947.
